# Supplementary figures and images for: Optimal compensation for neuron loss
Source: eLife journal article supplement (doi:10.7554/elife.12454), 2016-12-09

**A**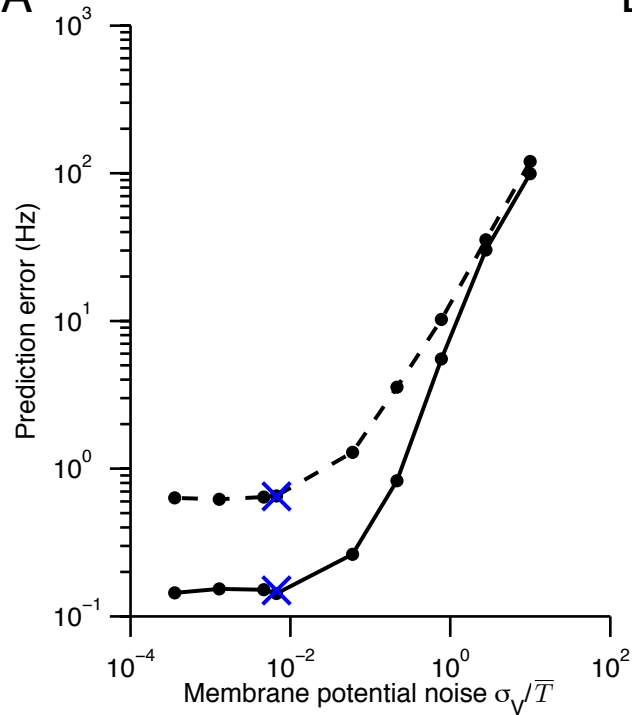**B**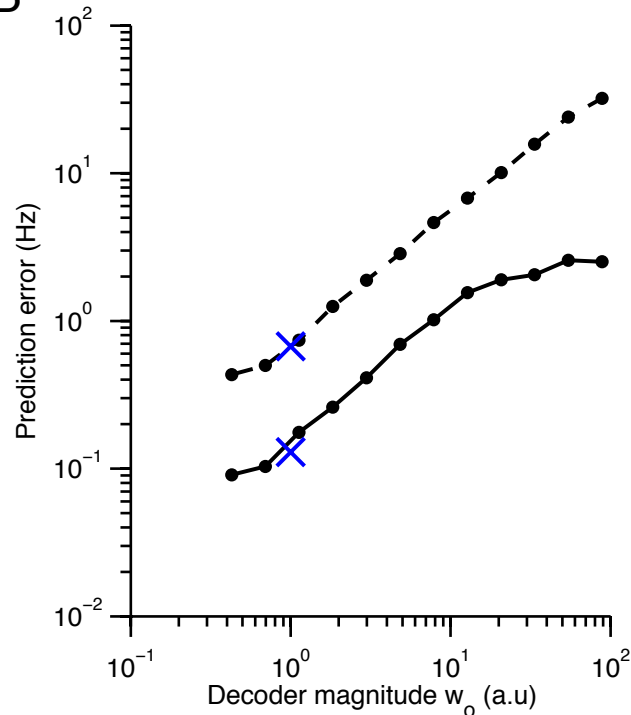**C**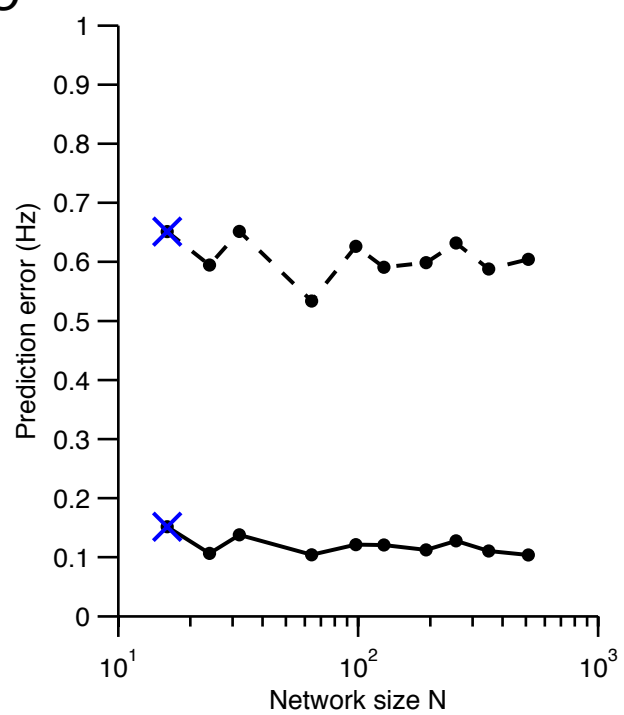

Supplement: supp [file elife-12454-supp-v1.zip]

**A**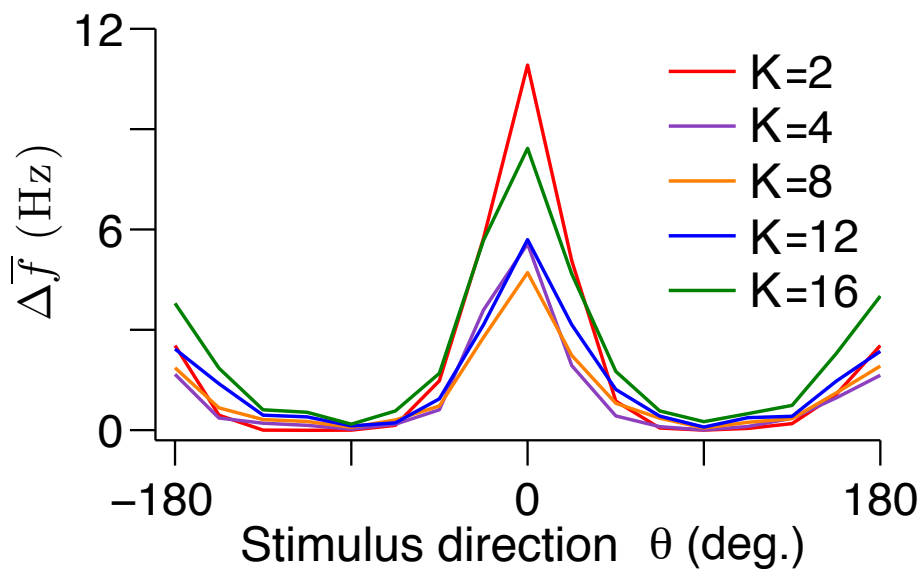**B**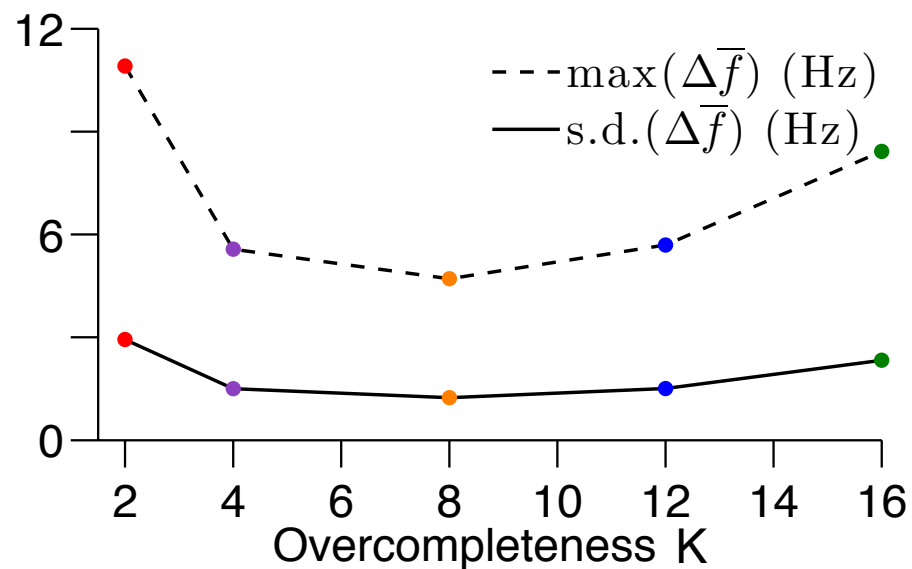**C**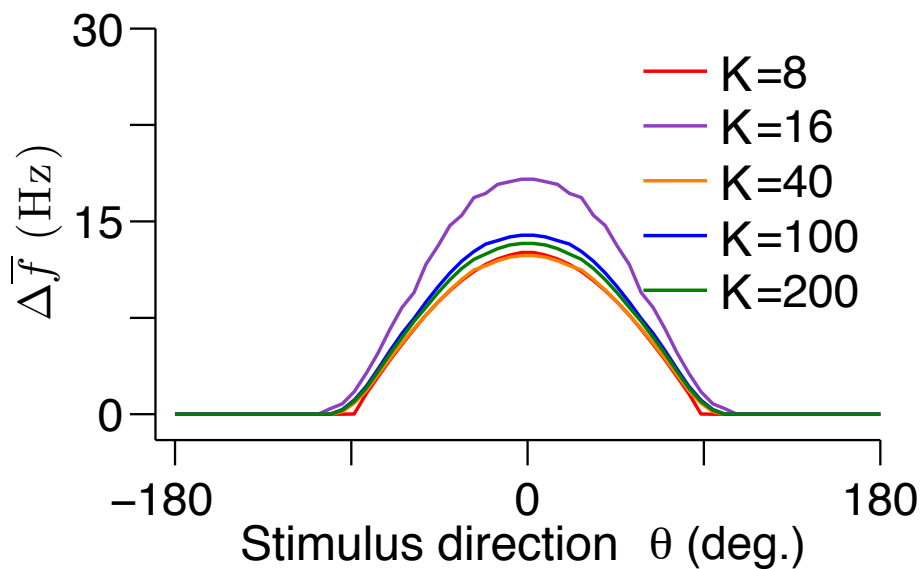**D**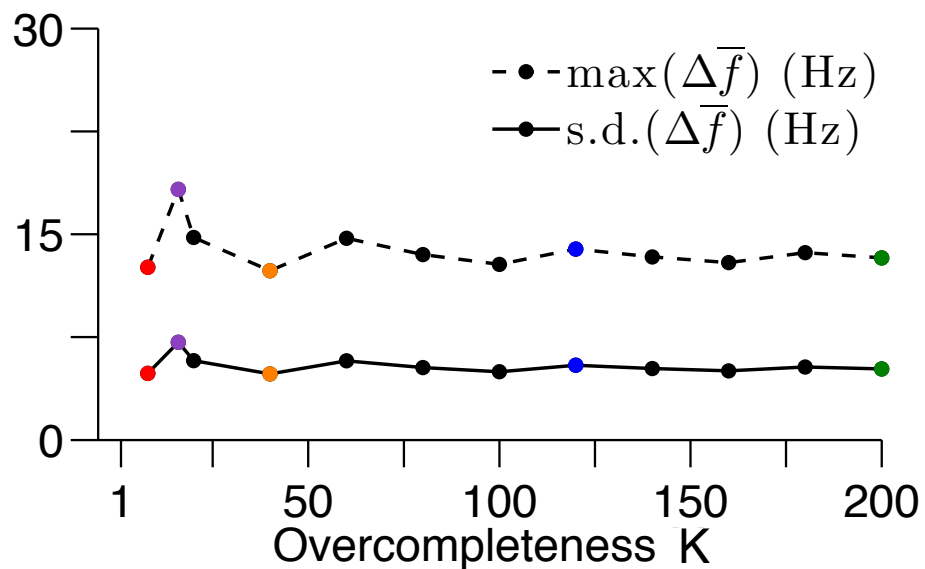

Supplement: supp [file elife-12454-supp-v1.zip]

# A Experiment

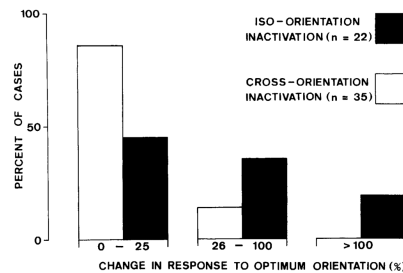

B

# Theory

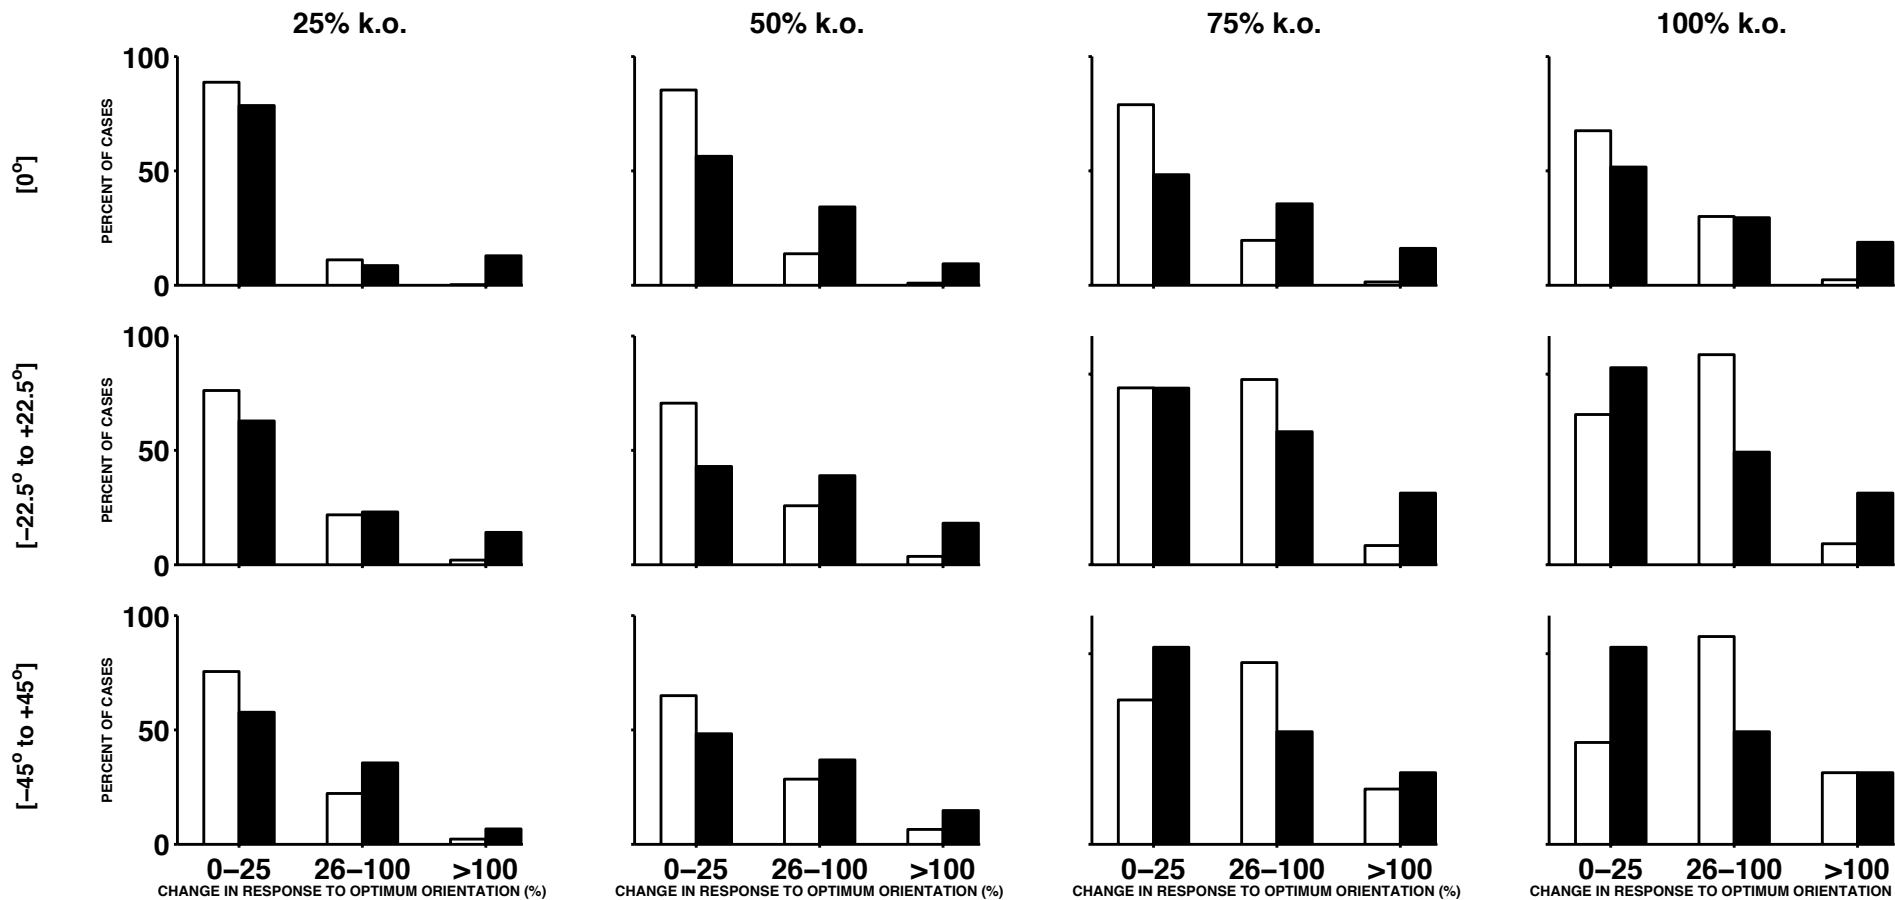

Supplement: supp [file elife-12454-supp-v1.zip]

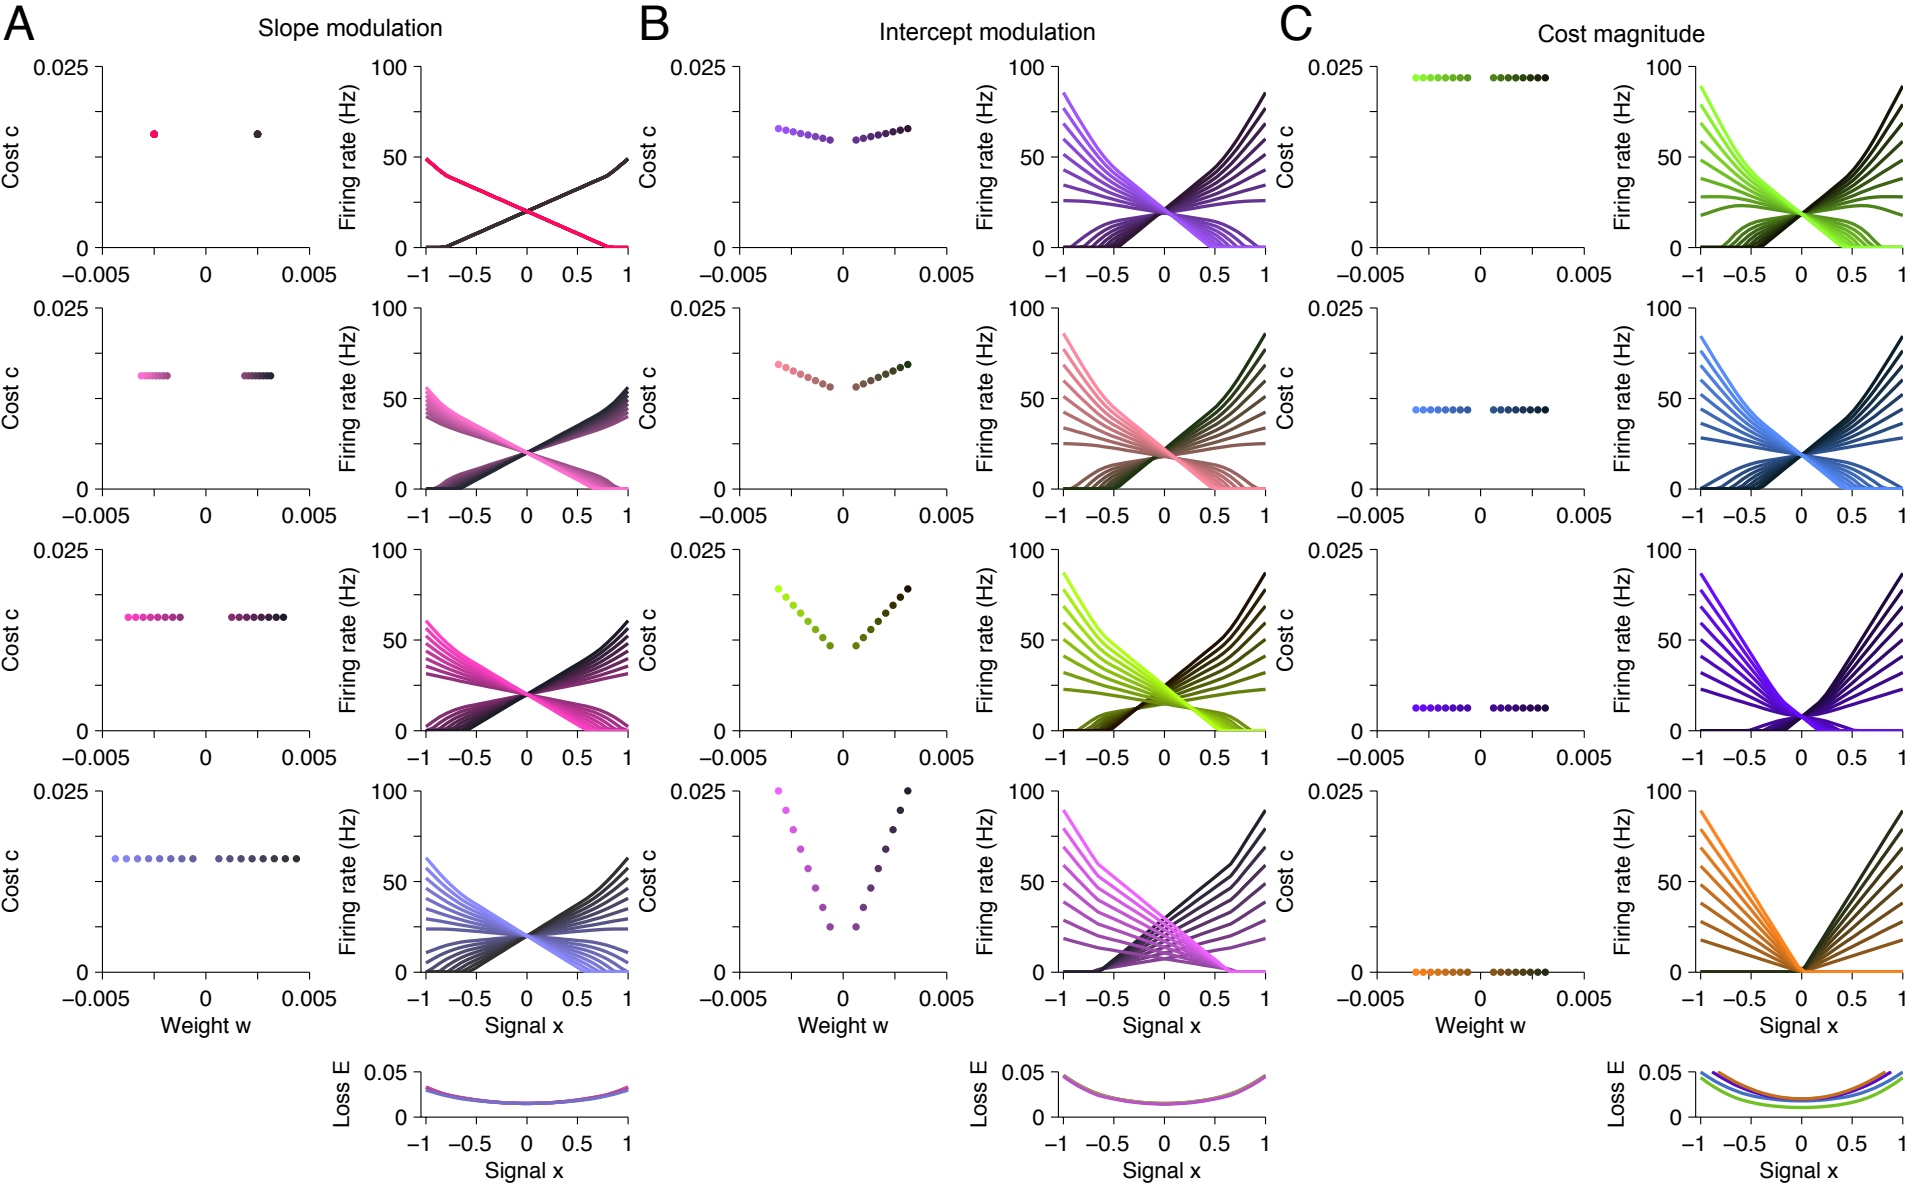

Supplement: supp [file elife-12454-supp-v1.zip]

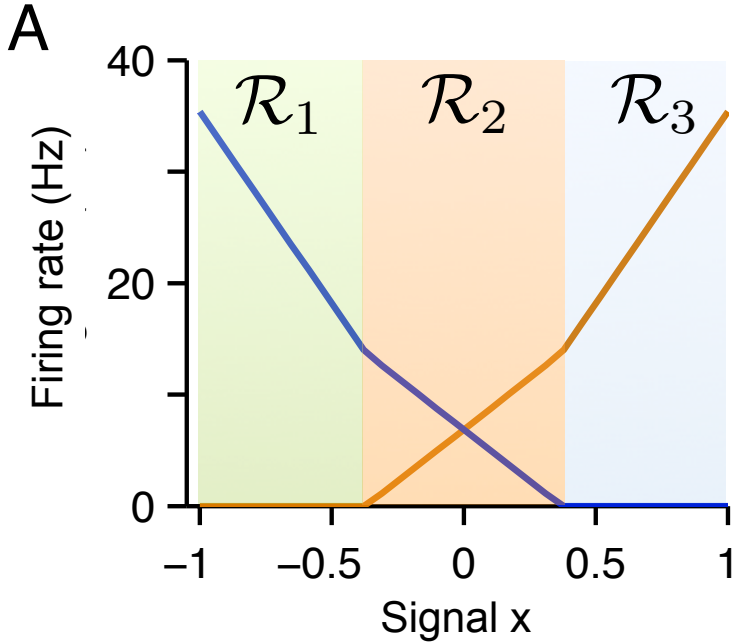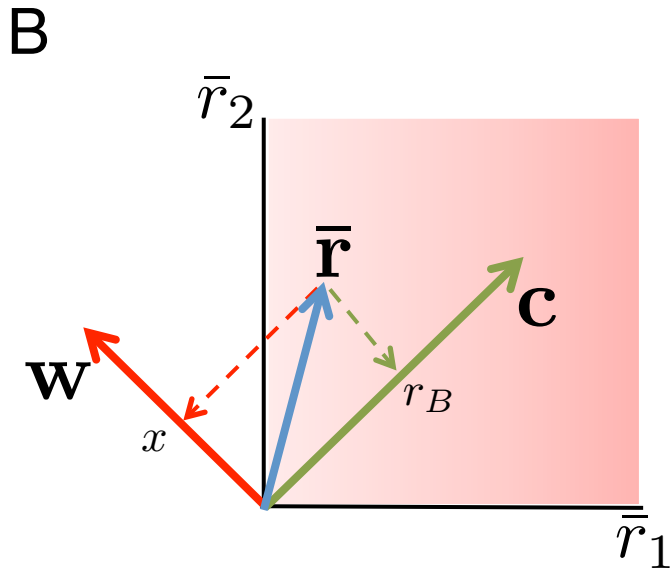

Supplement: supp [file elife-12454-supp-v1.zip]
